# Supplementary material for: Mortality for Lung Cancer among PVC Baggers Employed in the Vinyl Chloride Industry
Source: MDPI journal article supplement (doi:10.3390/ijerph19106246), 2022-05-20
Supplement: s1 [file s1]

**Supplementary Table S1. Distribution of the study variables by available/imputed data on smoking habit status.**

|                                                             | Overall,<br>N = 1658 <sup>1</sup> | Interviewed,<br>N = 848 <sup>1</sup> | Non interviewed<br>N = 810 <sup>1</sup> | <i>p</i> -value <sup>2</sup> |
|-------------------------------------------------------------|-----------------------------------|--------------------------------------|-----------------------------------------|------------------------------|
| <b>Age at first exposure,</b><br>n (%)                      |                                   |                                      |                                         | 0.068                        |
| [17.2,23.3] years                                           | 415 (25%)                         | 192 (23%)                            | 223 (28%)                               |                              |
| (23.3,27.4] years                                           | 414 (25%)                         | 220 (26%)                            | 194 (24%)                               |                              |
| (27.4,33.3] years                                           | 414 (25%)                         | 208 (25%)                            | 206 (25%)                               |                              |
| (33.3,57.9] years                                           | 415 (25%)                         | 228 (27%)                            | 187 (23%)                               |                              |
| <b>Year at first exposure, n (%)</b>                        |                                   |                                      |                                         | 0.014                        |
| [1951,1961]                                                 | 428 (26%)                         | 237 (28%)                            | 191 (24%)                               |                              |
| (1961,1968]                                                 | 407 (25%)                         | 223 (26%)                            | 184 (23%)                               |                              |
| (1968,1972]                                                 | 412 (25%)                         | 197 (23%)                            | 215 (27%)                               |                              |
| (1972,1986]                                                 | 411 (25%)                         | 191 (23%)                            | 220 (27%)                               |                              |
| <b>Duration of work, n (%)</b>                              |                                   |                                      |                                         | <0.001                       |
| [0.04,6.21] years                                           | 415 (25%)                         | 154 (18%)                            | 261 (32%)                               |                              |
| (6.21,12.4] years                                           | 418 (25%)                         | 203 (24%)                            | 215 (27%)                               |                              |
| (12.4,18.6] years                                           | 413 (25%)                         | 236 (28%)                            | 177 (22%)                               |                              |
| (18.6,31.7] years                                           | 412 (25%)                         | 255 (30%)                            | 157 (19%)                               |                              |
| <b>Time since dismissal to 31 July 1999 or death, n (%)</b> |                                   |                                      |                                         | <0.001                       |
| (0.00,14.1] years                                           | 814 (49%)                         | 494 (58%)                            | 320 (40%)                               |                              |
| (14.1,15.1] years                                           | 37 (2.2%)                         | 20 (2.4%)                            | 17 (2.1%)                               |                              |
| (15.1,23.1] years                                           | 424 (26%)                         | 165 (19%)                            | 259 (32%)                               |                              |
| (23.1,43.1] years                                           | 383 (23%)                         | 169 (20%)                            | 214 (26%)                               |                              |
| <b>Life status at 31 July 1999, n (%)</b>                   |                                   |                                      |                                         | <0.001                       |
| Alive                                                       | 1,404 (85%)                       | 776 (92%)                            | 628 (78%)                               |                              |
| Deceased for lung cancer                                    | 44 (2.7%)                         | 38 (4.5%)                            | 6 (0.7%)                                |                              |
| Deceased for cardiovascular disease                         | 45 (2.7%)                         | 5 (0.6%)                             | 40 (4.9%)                               |                              |
| Deceased for liver cancer                                   | 16 (1.0%)                         | 9 (1.1%)                             | 7 (0.9%)                                |                              |
| Deceased for other causes                                   | 149 (9.0%)                        | 20 (2.4%)                            | 129 (16%)                               |                              |
| <b>Time since 31 July 1999 to last follow-up, n (%)</b>     |                                   |                                      |                                         | <0.001                       |
| Deceased before the previous follow-up                      | 254 (15%)                         | 72 (8.5%)                            | 182 (22%)                               |                              |
| (0,6.27] years                                              | 161 (9.7%)                        | 45 (5.3%)                            | 116 (14%)                               |                              |

|                                                 |             |           |           |     |
|-------------------------------------------------|-------------|-----------|-----------|-----|
| (6.27,17.7] years                               | 1,243 (75%) | 731 (86%) | 512 (63%) |     |
| <b>Life Status at the last follow-up, n (%)</b> |             |           |           | 0.8 |
| Alive                                           | 1,181 (71%) | 595 (70%) | 586 (72%) |     |
| Deceased for lung cancer                        | 56 (3.4%)   | 28 (3.3%) | 28 (3.5%) |     |
| Deceased for cardiovascular disease             | 127 (7.7%)  | 71 (8.4%) | 56 (6.9%) |     |
| Deceased for liver cancer                       | 41 (2.5%)   | 23 (2.7%) | 18 (2.2%) |     |
| Deceased for other causes                       | 253 (15%)   | 131 (15%) | 122 (15%) |     |
| <b>Task as a bagger, n (%)</b>                  |             |           |           | 0.7 |
| Never                                           | 1,450 (87%) | 745 (88%) | 705 (87%) |     |
| Ever                                            | 120 (7.2%)  | 62 (7.3%) | 58 (7.2%) |     |
| Exclusive                                       | 88 (5.3%)   | 41 (4.8%) | 47 (5.8%) |     |

---

<sup>1</sup> n (%), <sup>2</sup> Pearson's Chi-squared test.

**Supplementary Table S2. Adjusted\* multivariate Mortality Rate Ratios (MRR) for lung cancer estimated by Poisson regression and 95% Confidence Intervals (95% CI) for the complete cases and for the imputed datasets. The value of  $\gamma$  represents the fraction of information missing due to nonresponse.**

| <b>Complete cases (n=848)</b>     |                       | <b>MRR</b> | <b>95% CI</b> |                            |
|-----------------------------------|-----------------------|------------|---------------|----------------------------|
| Duration of the task as<br>Bagger | 0                     | 1.00       |               |                            |
|                                   | <3 years              | 1.49       | (0.57-3.23)   |                            |
|                                   | ≥3 years              | 2.13       | (0.92-4.28)   |                            |
| Smoking habit                     | No smoker (reference) | 1.00       |               |                            |
|                                   | <15 cigarettes        | 4.46       | (1.43-19.5)   |                            |
|                                   | ≥15 cigarettes        | 22.9       | (8.39-94.1)   |                            |
| <b>Entire dataset (n=1658)</b>    |                       | <b>MRR</b> | <b>95% CI</b> | <b><math>\gamma</math></b> |
| Duration of the task as<br>Bagger | 0                     | 1.00       |               |                            |
|                                   | <3 years              | 1.22       | (0.61-2.47)   | 2.22%                      |
|                                   | ≥3 years              | 1.72       | (0.88-3.37)   | 2.90%                      |
| Smoking habit                     | No smoker (reference) | 1.00       |               |                            |
|                                   | <15 cigarettes        | 1.66       | (0.69-4.02)   | 42.1%                      |
|                                   | ≥15 cigarettes        | 5.63       | (2.67-11.9)   | 38.0%                      |

\* Adjusted for 10 years age-class (≤50, 51-60, 61-70, 71-80, >80) and calendar period (≤1980, 1981-1990, 1991-2000, 2001-2010, >2010), and latency (≤10, 11-20, 21-30, >30).
